# Supplementary material for: Analysis of the tyrosine kinome in melanoma reveals recurrent mutations in ERBB4
Source: Springer Nature journal article supplement (doi:10.1038/ng.438), 2009-08-30
Supplement: 41588_2009_BFng438_MOESM7_ESM.pdf [file 41588_2009_BFng438_MOESM7_ESM.pdf]

## **Supplementary Material:**

### **Analysis of the Tyrosine Kinome in Melanoma Reveals Recurrent Mutations in *ERBB4***

Todd D. Prickett, Neena S. Agrawal, Xiaomu Wei, Kristin E. Yates, Jimmy C. Lin, John Wunderlich, Julia C. Cronin, Pedro Cruz, NISC Comparative Sequencing Program, Steven A. Rosenberg, Yardena Samuels\*

\* Corresponding author: Yardena Samuels, National Human Genome Research Institute, NIH, 50 South Drive, MSC 8000, Building 50, Room 5140, Bethesda MD 20892-8000, Phone: 301-451-2628, Fax: 301-480-9864, Email: samuelsy@mail.nih.gov

## Supplementary Figures

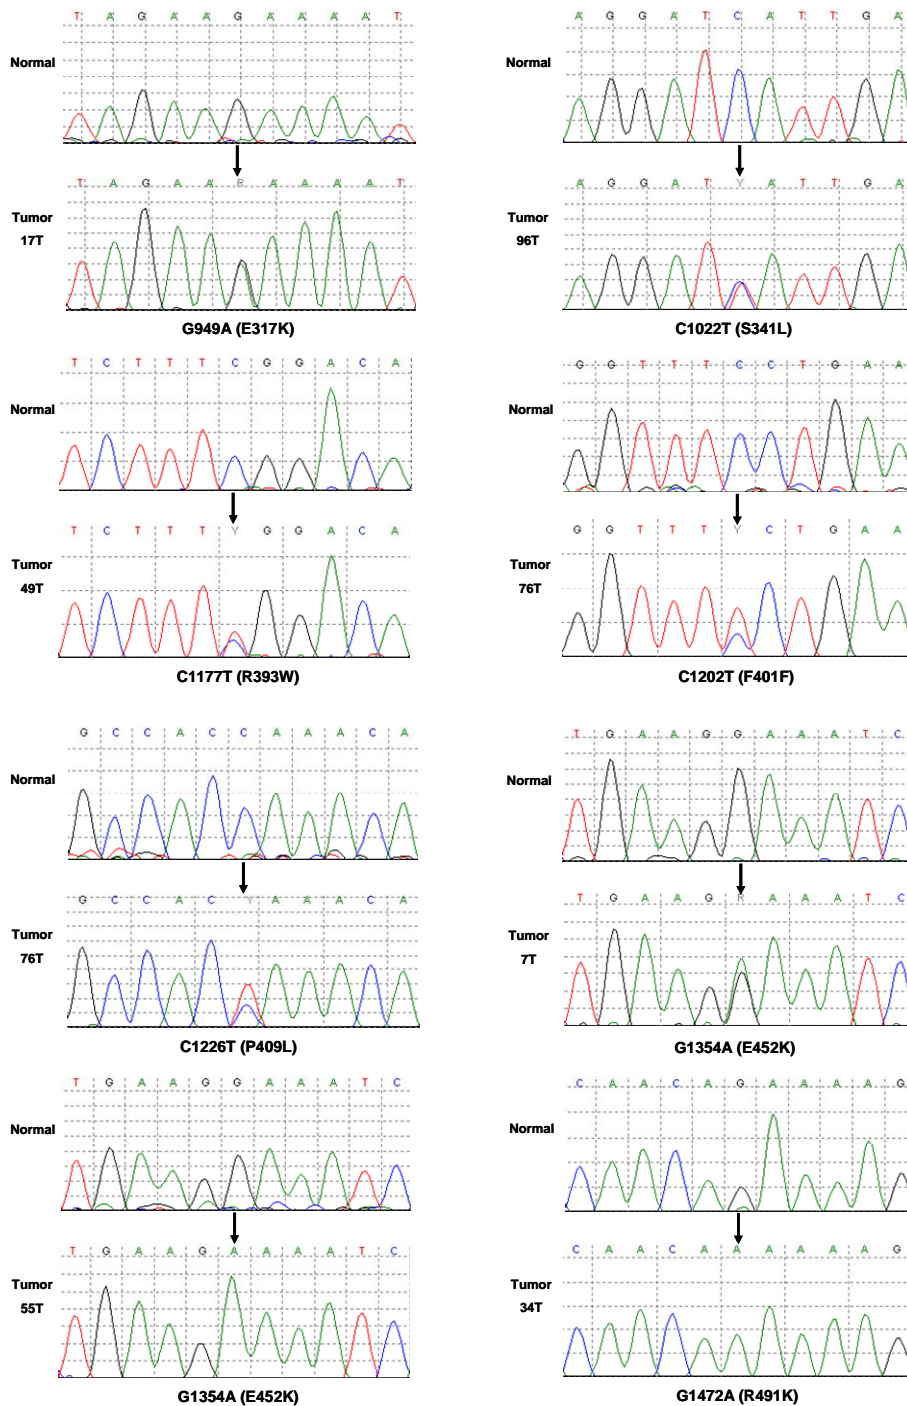

**Supplementary Figure 1. Detection of mutations in ERBB4.** Representative examples of mutations in ERBB4. In each case, the top sequence chromatogram was obtained from normal tissue and the lower sequence chromatogram from the indicated tumors. Arrows indicate the location of missense mutations. The nucleotide and amino acid alterations are indicated below the chromatograms.

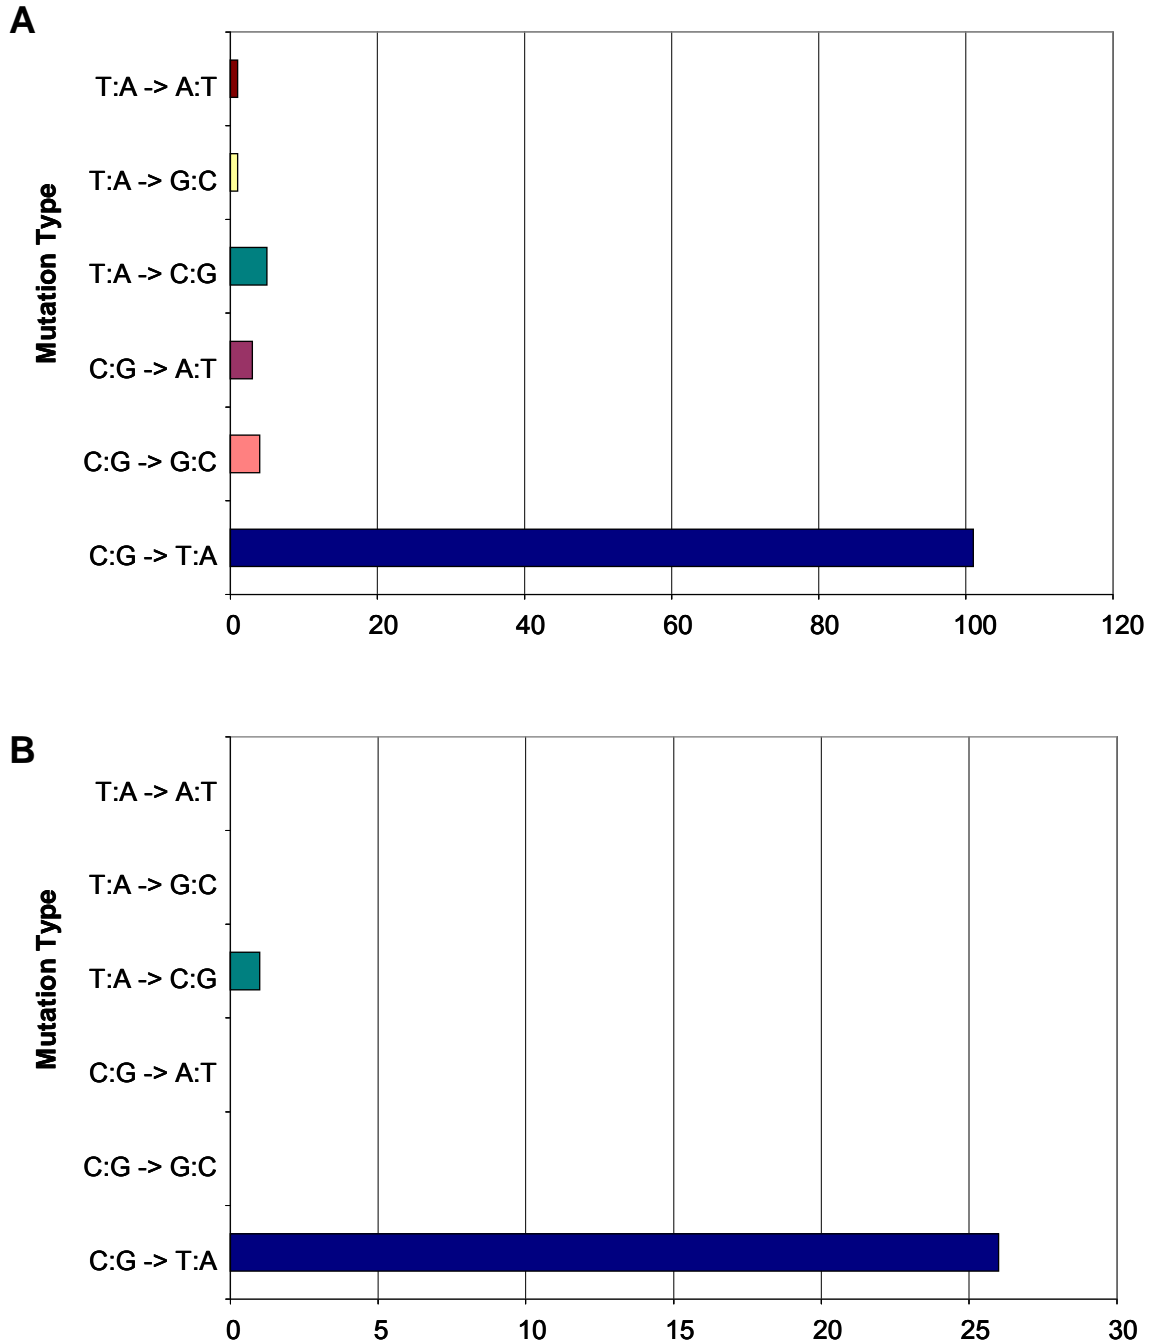

**Supplementary Figure 2. Mutation spectra of single base pair substitutions.**

A. Kinome mutation spectrum. The number of each of the six classes of base substitutions resulting in nonsynonymous changes in the kinome screen is shown. B. Mutation spectra of single base pair substitutions in ERBB4. The number of each of the six classes of base substitutions resulting in nonsynonymous changes in ERBB4 is shown.

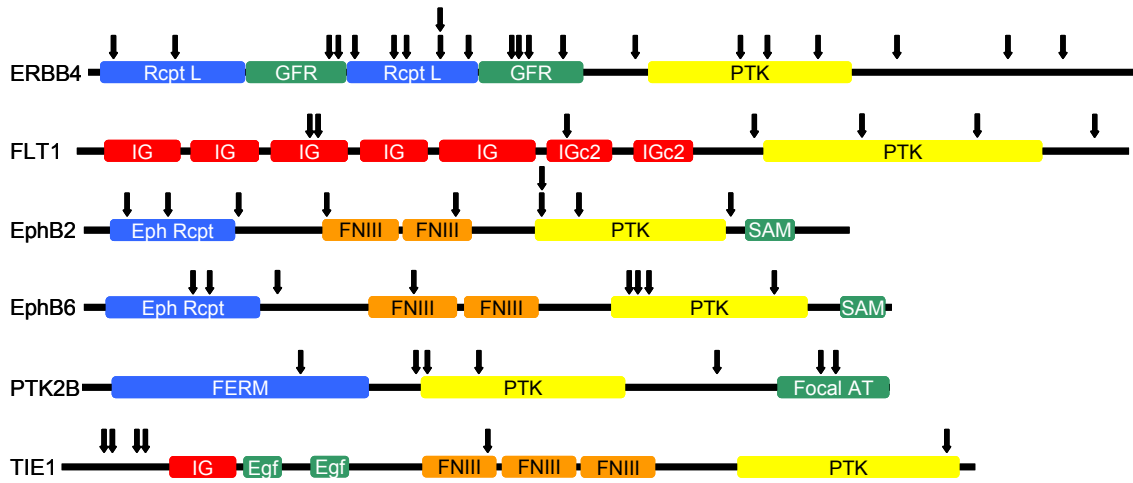

**Supplementary Figure 3. Distribution of mutations in ERBB4, FLT1, EphB2, EphB6, PTK2B, and TIE1.** Black arrows indicate positions of nonsynonymous mutations and boxes represent functional domains (Rcpt L, Receptor L; GFR, Growth Factor Receptor; PTK, Protein Tyrosine Kinase; IG, Immunoglobulin; IGc2, Immunoglobulin C-2 Type; Eph Rcpt, Ephrin Receptor; FNIII, Fibronectin Type III; SAM, Sterile Alpha Motif; FERM, Protein 4.1, Ezrin, Radixin, Moesin (FERM) Domain; Focal AT, Focal Adhesion Targeting Region)

**A**

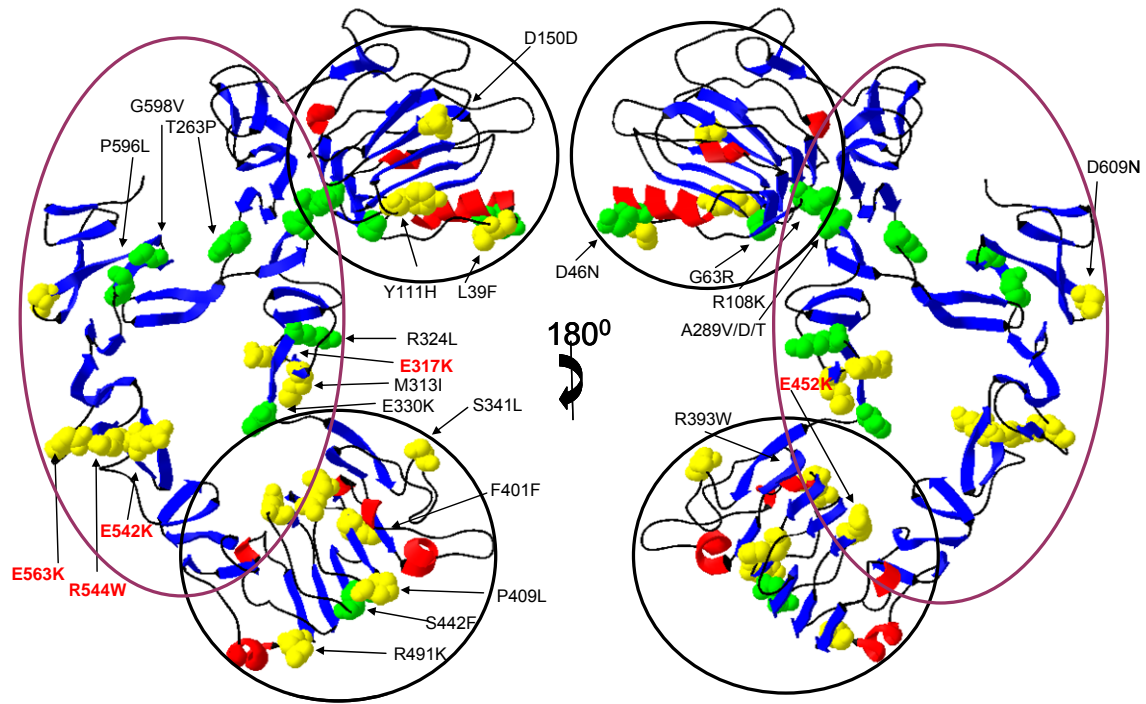

**B**

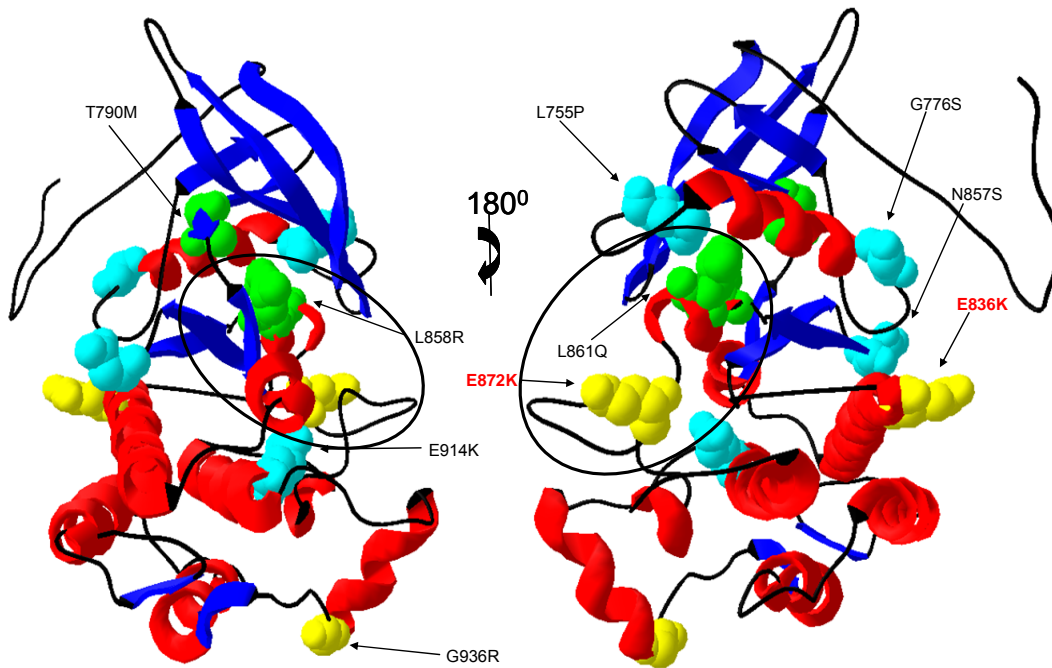

**Supplementary Figure 4. Ribbon diagrams of ERBB4.** A. Distribution of ERBB4 mutations in a ribbon diagram of its extracellular domain (PDB ID 2ahx). The two views are related to one another by a 180° rotation about a vertical axis.  $\alpha$ -helices are shown in red,  $\beta$ -sheets are shown in blue, and loops are shown in black. All mutations are represented as space-filling molecules. ERBB4 mutations are shown in yellow, and the equivalent positions of known activating EGFR mutations are shown in green. The receptor L domain is denoted by black circles, the growth factor receptor domain is denoted by purple circles and cloned ERBB4 mutants are highlighted in red. B. Distribution of ERBB4 mutations in a ribbon of its kinase domain (PDB ID 2r4b). The two views are related to one another by a 180° rotation about a vertical axis.  $\alpha$ -helices are shown in red,  $\beta$ -sheets are shown in blue, and loops are shown in black. All mutations are represented as space-filling molecules. ERBB4 mutations are shown in yellow, equivalent positions of known ERBB2 mutations are shown in cyan, and the equivalent positions of known activating EGFR mutations are shown in green. The activation loop is denoted by black circles. In A and B, Images were created by SWISS-MODEL. Determination of the location of previously reported EGFR and ERBB2 mutations is described in the experimental procedures and cloned ERBB4 mutants are highlighted in red.

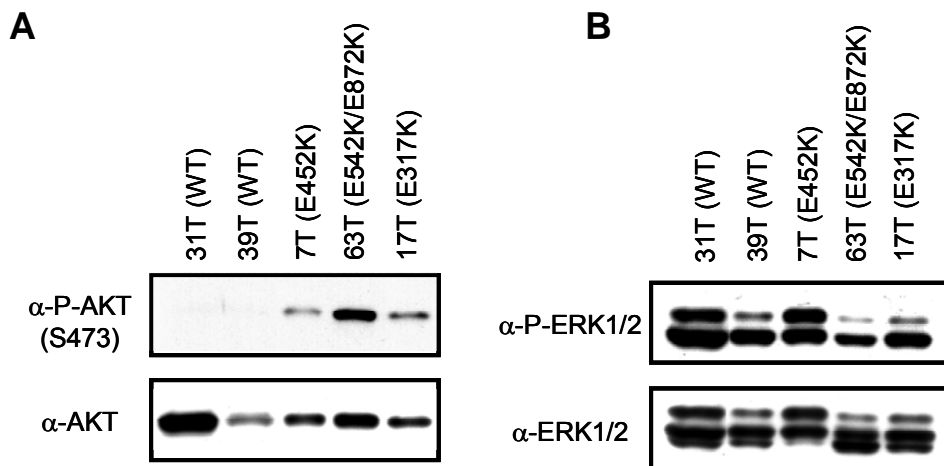

**Supplementary Figure 5. Effects of ERBB4 mutation on AKT and ERK phosphorylation.** Melanoma cell lines, containing either WT or mutant ERBB4, were harvested and analyzed by immunoblot. Shown are immunoblots of lysates probed with the indicated antibodies ( $\alpha$ -P-ERK1/2 (recognizes phosphorylation of T202 and Y204 on ERK1 and T185 and Y187 on ERK2).

**A**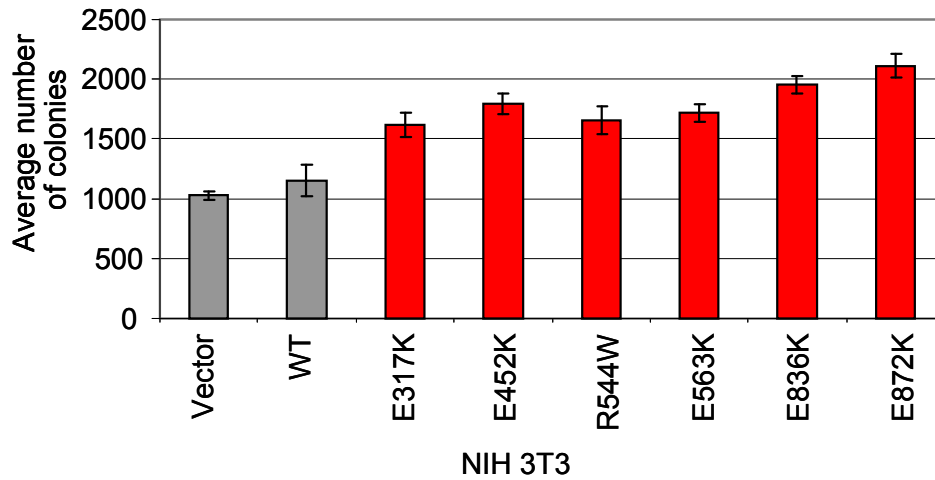**B**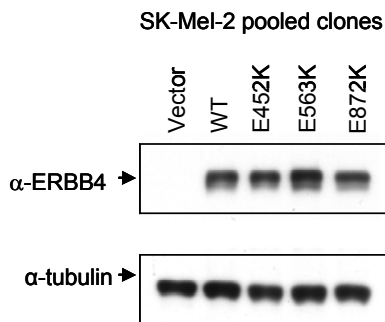**C**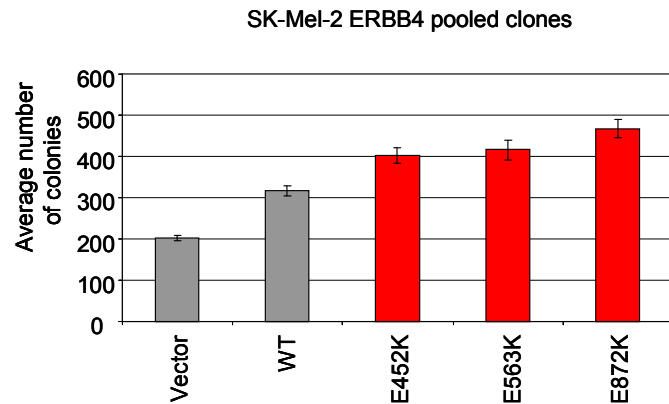

**Supplementary Figure 6. Effect of ERBB4 mutations on cell growth in NIH 3T3 and SK-Mel-2 cells.** A. Growth of NIH 3T3 cells expressing vector, WT ERBB4 or various ERBB4 missense mutants in soft agar. The graph indicates the number of colonies after 14 days. B. Detection of ERBB4 protein expression in stable transfectants of SK-Mel-2 melanoma cells by immunoblot analysis, lysates from the different clones stably transfected with an empty vector, human WT ERBB4 or the indicated ERBB4 mutants were immunoprecipitated and immunoblotted with ERBB4 antibody. C. Anchorage-independent proliferation of SK-Mel-2 cell clones expressing the indicated constructs was assessed by measuring colony formation in soft agar. Graph indicates number of colonies observed after 14 days of growth.

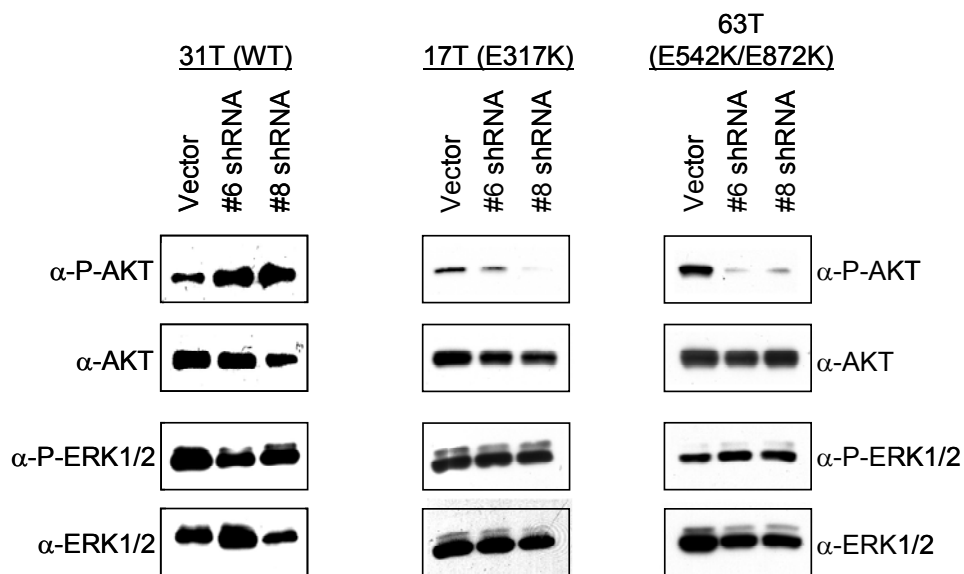

**Supplementary Figure 7. Knockdown of ERBB4 protein causes reduced activation of the AKT pathway but not of the ERK pathway.** Melanoma cell lines, containing either WT or mutant ERBB4, were harvested and analyzed by western blot. Shown are immunoblots of lysates probed with the indicated antibodies ( $\alpha$ -P-ERK1/2 (recognizes phosphorylation of T202 and Y204 on ERK1 and T185 and Y187 on ERK2)).



**A**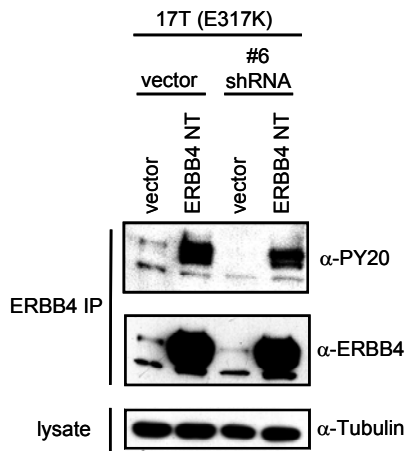**B**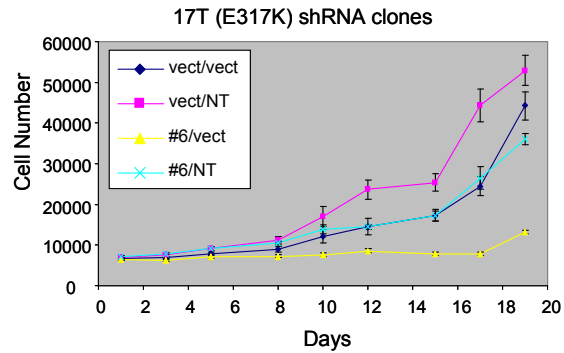

**Supplementary Figure 8. Rescue of oncogene dependence by exogenous non-targetable ERBB4.** A. Melanoma cells harboring mutant ERBB4 and stably expressing control or ERBB4 shRNA #6 transduced with either vector or non targetable (NT) ERBB4 were analyzed by immunoprecipitation of lysates with  $\alpha$ -ERBB4. Samples were analyzed by immunoblotting with the indicated antibodies. As a loading control lysates were immunoblotted with  $\alpha$ -Tubulin. B. Melanoma cells expressing vector or the ERBB4 shRNA #6 transduced with a vector or NT ERBB4 were evaluated for cell proliferation by measuring the average cell number at each time point by determining DNA content using SYBR Green I.

**A**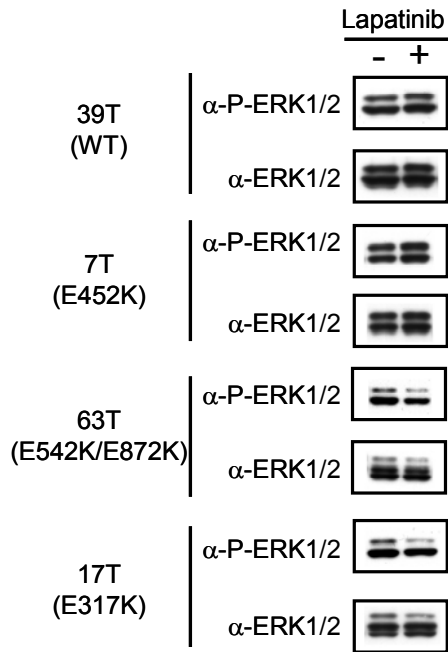**B**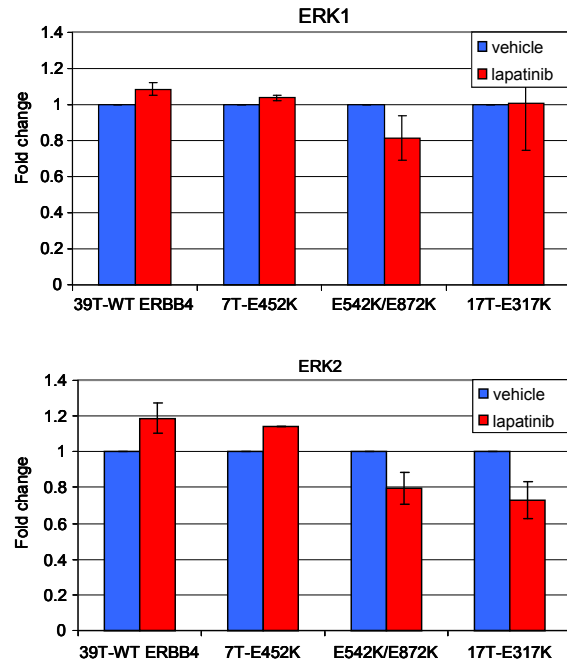

**Supplementary Figure 9. Effect of lapatinib on ERK1/2 signaling pathways.**

A. Melanoma lines expressing mutant ERBB4 exhibit increased lapatinib sensitivity with respect to ERK1 and ERK2 phosphorylation. Cells were treated for 72 hrs with 5  $\mu$ M lapatinib or vehicle as control. The activity of ERK1 and ERK2 was determined by immunoblotting with phospho-specific antibodies ( $\alpha$ -P-ERK1/2 - recognizes phosphorylation of T202 and Y204 on ERK1 and T185 and Y187 on ERK2). Total ERK protein was also determined by immunoblotting. Shown are representative blots. B. Quantitative assessment of data from one melanoma cell line harboring WT ERBB4 and three melanoma cell lines harboring mutant ERBB4. The ratio of band intensities of P-ERK1/ERK1 or P-ERK2/ERK2 was analyzed for each melanoma cell line.

**Table S1. Tyrosine Kinase genes analyzed**

| CCDS accession and<br>amplimer number | Ref Seq accession and<br>amplimer number | Gene Name   | Gene Description                                                                                               |
|---------------------------------------|------------------------------------------|-------------|----------------------------------------------------------------------------------------------------------------|
| CCDS35165.1                           | NM_007313.2                              | ABL1/ABL    | v-abl Abelson murine leukemia viral oncogene homolog 1                                                         |
| CCDS30947.1                           | NM_007314.2                              | ABL2/ARG    | v-abl Abelson murine leukemia viral oncogene homolog 2 (arg, Abelson-related gene)                             |
| CCDS33928.1                           | NM_005781.4                              | ACK1/TNK2   | tyrosine kinase, non-receptor, 2                                                                               |
| CCDS33172.1                           | NM_004304.3                              | ALK         | anaplastic lymphoma kinase (Ki-1)                                                                              |
| CCDS12575.1                           | NM_021913.3                              | AXL         | AXL receptor tyrosine kinase                                                                                   |
| CCDS5982.1                            | NM_001715.2                              | BLK         | B lymphoid tyrosine kinase                                                                                     |
| CCDS14168.1                           | NM_203281.2                              | BMX         | BMX non-receptor tyrosine kinase                                                                               |
| CCDS13524.1                           | NM_005975.2                              | BRK/PTK6    | PTK6 protein tyrosine kinase 6                                                                                 |
| CCDS14482.1                           | NM_000061.1                              | BTK         | Bruton agammaglobulinemia tyrosine kinase                                                                      |
| CCDS4302.1                            | NM_005211.2                              | CSF1R       | colony stimulating factor 1 receptor, formerly McDonough feline sarcoma viral (v-fms) oncogene homolog         |
| CCDS10269.1                           | NM_004383.1                              | CSK         | c-src tyrosine kinase                                                                                          |
| CCDS4690.1                            | NM_001954.4                              | DDR1        | discoidin domain receptor family, member 1                                                                     |
| CCDS1241.1                            | NM_006182.2                              | DDR2        | discoidin domain receptor family, member 2                                                                     |
| CCDS5514.1                            | NM_005228.3                              | EGFR        | epidermal growth factor receptor (erythroblastic leukemia viral (v-erb-b) oncogene homolog, avian)             |
| CCDS5984.1                            | NM_005232.3                              | EPHA1       | ephrin receptor EphA1                                                                                          |
| CCDS169.1                             | NM_004431.2                              | EPHA2       | ephrin receptor EphA2                                                                                          |
| CCDS2922.1                            | NM_005233.5                              | EPHA3       | ephrin receptor EphA3 isoform a precursor                                                                      |
| CCDS2447.1                            | NM_004438.3                              | EPHA4       | ephrin receptor EphA4                                                                                          |
| CCDS3514.1                            | NM_182472.1                              | EPHA5       | ephrin receptor EphA5 isoform b                                                                                |
| N/A                                   | NM_001080448.2                           | EPHA6       | EPH receptor A6 isoform a                                                                                      |
| CCDS5031.1                            | NM_004440.2                              | EPHA7       | ephrin receptor EphA7                                                                                          |
| CCDS30626.1                           | NM_001006943.1                           | EPHA8       | EPH receptor A8 isoform 2 precursor                                                                            |
| CCDS425.1                             | NM_173641.2                              | EPHA10      | EPH receptor A10 isoform 2                                                                                     |
| N/A                                   | NM_004441.3                              | EPHB1       | ephrin receptor EphB1 precursor                                                                                |
| CCDS230.1                             | NM_004442.6                              | EPHB2       | ephrin receptor EphB2 isoform 2 precursor                                                                      |
| CCDS3268.1                            | NM_004443.3                              | EPHB3       | ephrin receptor EphB3 precursor                                                                                |
| CCDS5706.1                            | NM_004444.4                              | EPHB4       | ephrin receptor EphB4 precursor                                                                                |
| CCDS5873.1                            | NM_004445.2                              | EPHB6       | ephrin receptor EphB6 precursor                                                                                |
| CCDS32642.1                           | NM_004448.2                              | ERBB2       | v-erb-b2 erythroblastic leukemia viral oncogene homolog 2, neuro/glioblastoma derived oncogene homolog (avian) |
| CCDS31833.1                           | NM_001982.2                              | ERBB3       | v-erb-b2 erythroblastic leukemia viral oncogene homolog 3 (avian)                                              |
| CCDS2394.1                            | NM_005235.2                              | ERBB4       | v-erb-a erythroblastic leukemia viral oncogene homolog 4 (avian)                                               |
| CCDS6381.1                            | NM_153831.2                              | FAK/PTK2    | PTK2 protein tyrosine kinase 2                                                                                 |
| CCDS4098.1                            | NM_005246.2                              | FER         | fer (fps/fes related) tyrosine kinase (phosphoprotein NCP94)                                                   |
| CCDS10365.1                           | NM_002005.2                              | FES         | V-FES feline sarcoma viral/V-FPS fujinami avian                                                                |
| CCDS6107.1                            | NM_023110.2                              | FGFR1       | fibroblast growth factor receptor 1 (fms-related tyrosine kinase 2, Pfeiffer syndrome)                         |
| CCDS1298.1                            | NM_000141.3                              | FGFR2       | fibroblast growth factor receptor 2 (bacteria-expressed kinase, keratinocyte growth factor receptor)           |
| CCDS3353.1                            | NM_000142.2                              | FGFR3       | fibroblast growth factor receptor 3 (achondroplasia, thanatophoric dwarfism)                                   |
| CCDS4410.1                            | NM_002011.3                              | FGFR4       | fibroblast growth factor receptor 4 isoform 1                                                                  |
| CCDS305.1                             | NM_005248.2                              | FGR         | Gardner-Rasheed feline sarcoma viral (v-fgr) oncogene homolog                                                  |
| CCDS9330.1                            | NM_002019.3                              | FLT1/VEGFR1 | fms-related tyrosine kinase 1 (vascular endothelial growth factor/vascular permeability factor receptor)       |
| CCDS31953.1                           | NM_004119.2                              | FLT3        | fms-related tyrosine kinase 3                                                                                  |
| CCDS4457.1                            | NM_182925.3                              | FLT4/VEGFR3 | fms-related tyrosine kinase 4                                                                                  |
| CCDS5103.1                            | NM_002031.2                              | FRK         | fyn-related kinase                                                                                             |
| CCDS5094.1                            | NM_002037.3                              | FYN         | FYN oncogene related to SRC, FGR, YES                                                                          |
| CCDS33460.1                           | NM_002110.2                              | HCK         | hemopoietic cell kinase                                                                                        |
| CCDS10378.1                           | NM_000875.3                              | IGF1R       | insulin-like growth factor 1 receptor                                                                          |
| CCDS12176.1                           | NM_000208.2                              | INSR        | insulin receptor                                                                                               |
| CCDS1160.1                            | NM_014215.1                              | INSRR       | insulin receptor-related receptor                                                                              |
| CCDS4336.1                            | NM_005546.3                              | ITK         | IL2-inducible T-cell kinase                                                                                    |
| N/A                                   | NM_002227.2                              | JAK1        | Janus kinase 1                                                                                                 |
| CCDS6457.1                            | NM_004972.2                              | JAK2        | Janus kinase 2                                                                                                 |
| CCDS12366.1                           | NM_000215.2                              | JAK3        | Janus kinase 3                                                                                                 |
| CCDS3497.1                            | NM_002253.1                              | KDR/VEGFR2  | kinase insert domain receptor (a type III receptor tyrosine kinase)                                            |
| CCDS3496.1                            | NM_000222.2                              | KIT         | v-kit Hardy-Zuckerman 4 feline sarcoma viral oncogene homolog                                                  |
| CCDS359.1                             | NM_005356.3                              | LCK         | lymphocyte-specific protein tyrosine kinase                                                                    |
| CCDS10078.1                           | NM_206961.1                              | LTK         | leukocyte tyrosine kinase                                                                                      |
| CCDS6162.1                            | NM_002350.2                              | LYN         | v-yes-1 Yamaguchi sarcoma viral related oncogene homolog                                                       |
| CCDS12113.1                           | NM_002378.3                              | MATK        | megakaryocyte-associated tyrosine kinase                                                                       |
| CCDS2094.1                            | NM_006343.2                              | MERTK/MER   | c-mer proto-oncogene tyrosine kinase                                                                           |
| N/A                                   | NM_000245.2                              | MET         | met proto-oncogene (hepatocyte growth factor receptor)                                                         |
| CCDS2807.1                            | NM_002447.2                              | MST1R/RON   | macrophage stimulating 1 receptor (c-met-related tyrosine kinase)                                              |
| N/A                                   | NM_005592.1                              | MUSK        | muscle, skeletal, receptor tyrosine kinase                                                                     |
| CCDS1161.1                            | NM_002529.3                              | NTRK1       | neurotrophic tyrosine kinase, receptor, type 1                                                                 |
| CCDS35053.1                           | NM_001007097.1                           | NTRK2       | neurotrophic tyrosine kinase receptor type 2                                                                   |
| CCDS32322.1                           | NM_001012338.1                           | NTRK3       | neurotrophic tyrosine kinase receptor type 3                                                                   |
| CCDS3495.1                            | NM_006206.3                              | PDGFRA      | platelet-derived growth factor receptor alpha                                                                  |
| CCDS4303.1                            | NM_002609.3                              | PDGFRB      | platelet-derived growth factor receptor beta                                                                   |
| CCDS4884.1                            | NM_002821.3                              | PTK7        | PTK7 protein tyrosine kinase 7                                                                                 |
| CCDS6057.1                            | NM_004103.3                              | PYK2/PTK2B  | PTK2B protein tyrosine kinase 2 beta                                                                           |
| CCDS7200.1                            | NM_020975.4                              | RET         | ret proto-oncogene                                                                                             |
| CCDS626.1                             | NM_005012.2                              | ROR1        | receptor tyrosine kinase-like orphan receptor 1                                                                |
| CCDS6691.1                            | NM_004560.2                              | ROR2        | receptor tyrosine kinase-like orphan receptor 2                                                                |
| CCDS5116.1                            | NM_002944.2                              | ROS1        | v-ros UR2 sarcoma virus oncogene homolog 1 (avian)                                                             |
| N/A                                   | NM_001005861.2                           | RYK         | RYK receptor-like tyrosine kinase                                                                              |
| CCDS13294.1                           | NM_005417.3                              | SRC         | v-src sarcoma (Schmidt-Ruppin A-2) viral oncogene homolog (avian)                                              |
| CCDS13525.1                           | NM_080823.2                              | SRMS        | src-related kinase lacking C-terminal regulatory tyrosine and N-terminal myristylation sites                   |
| CCDS6688.1                            | NM_003177.3                              | SYK         | spleen tyrosine kinase                                                                                         |
| CCDS3481.1                            | NM_003215.2                              | TEC         | tec protein tyrosine kinase                                                                                    |
| CCDS6519.1                            | NM_000459.2                              | TEK         | TEK tyrosine kinase, endothelial (venous malformations, multiple cutaneous and mucosal)                        |
| CCDS482.1                             | NM_005424.2                              | TIE         | tyrosine kinase with immunoglobulin-like and EGF-like domains 1                                                |
| N/A                                   | NM_003985.3                              | TNK1        | tyrosine kinase, non-receptor, 1                                                                               |
| CCDS3480.1                            | NM_003328.2                              | TXK         | TXK tyrosine kinase                                                                                            |
| CCDS12236.1                           | NM_003331.3                              | TYK2        | tyrosine kinase 2                                                                                              |
| CCDS10080.1                           | NM_006293.2                              | TYRO3       | TYRO3 protein tyrosine kinase                                                                                  |
| CCDS11824.1                           | NM_005433.3                              | YES1        | v-yes-1 Yamaguchi sarcoma viral oncogene homolog 1                                                             |
| CCDS33254.1                           | NM_001079.3                              | ZAP70       | zeta-chain (TCR) associated protein kinase 70kDa                                                               |









|                                          |             |             |                          |                         |                   |                   |
|------------------------------------------|-------------|-------------|--------------------------|-------------------------|-------------------|-------------------|
| TNK1_Exon-6                              | N/A         | NM_003985.3 | AAAGAGGACTTTTGTGAAGATGG  | TGTCAACGACTGCAACTG      | TGTAACAGCAGGCCAGT | CAGGAACAGCTATGACC |
| TXK_Exon-10                              | CCDS3480.1  | NM_003328.2 | GACATTGGAGCTTGGGAAGTGT   | TCCCAGGTCTAGTTTTGGTGG   | TGTAACAGCAGGCCAGT | CAGGAACAGCTATGACC |
| TXK_Exon-11                              | CCDS3480.1  | NM_003328.2 | TAATTTGGACCATATCTTACCA   | AGTCACTCTTTCCTCCCTCTTG  | TGTAACAGCAGGCCAGT | CAGGAACAGCTATGACC |
| TXK_Exon-13                              | CCDS3480.1  | NM_003328.2 | ACGATGGGGATGATGGTAGAA    | GCAGGCTCTTTGTAGAGTTAKGA | TGTAACAGCAGGCCAGT | CAGGAACAGCTATGACC |
| TXK_Exon-14                              | CCDS3480.1  | NM_003328.2 | TGCAGAACCACATCTCAACCA    | AAAAAGAAAGAAATCTACTGG   | TGTAACAGCAGGCCAGT | CAGGAACAGCTATGACC |
| TXK_Exon-15                              | CCDS3480.1  | NM_003328.2 | GTGCAATCCCTCTCACACATA    | TCACCCCTCACTCACTG       | TGTAACAGCAGGCCAGT | CAGGAACAGCTATGACC |
| TYK2_Exon-10;TYK2_Exon-11                | CCDS12236.1 | NM_003331.3 | GGTCTGGTCACTCATCTCTG     | CTACCCCTGATCCTCACAG     | TGTAACAGCAGGCCAGT | CAGGAACAGCTATGACC |
| TYK2_Exon-10;TYK2_Exon-11;TYK2_Exon-12   | CCDS12236.1 | NM_003331.3 | GGGATCAGAGTACAGGTGAG     | GGGTTGACCAGAAGGAGATCA   | TGTAACAGCAGGCCAGT | CAGGAACAGCTATGACC |
| TYK2_Exon-10;TYK2_Exon-11;TYK2_Exon-12   | CCDS12236.1 | NM_003331.3 | AGGGTGGCTGTCTGGTAGAA     | GGGTTGACCAGAAGGAGATCA   | TGTAACAGCAGGCCAGT | CAGGAACAGCTATGACC |
| TYK2_Exon-14;TYK2_Exon-15                | CCDS12236.1 | NM_003331.3 | TCAGTCTGTACTTTCGCTTCTG   | ATAGTCAAGTTGCTCTTTTCA   | TGTAACAGCAGGCCAGT | CAGGAACAGCTATGACC |
| TYK2_Exon-14;TYK2_Exon-15                | CCDS12236.1 | NM_003331.3 | CTGTGTGTAGCCAGAGAGA      | ATAGTCAAGTTGCTCTTTTCA   | TGTAACAGCAGGCCAGT | CAGGAACAGCTATGACC |
| TYK2_Exon-16                             | CCDS12236.1 | NM_003331.3 | CTTATGAATGCCACTGGAAGAA   | GCCCAGAGAGGTTTTATCTA    | TGTAACAGCAGGCCAGT | CAGGAACAGCTATGACC |
| TYK2_Exon-17;TYK2_Exon-18                | CCDS12236.1 | NM_003331.3 | GTACTGGGGAAGGATCG        | CTGCTGGGGAAGGATCG       | TGTAACAGCAGGCCAGT | CAGGAACAGCTATGACC |
| TYK2_Exon-17;TYK2_Exon-18                | CCDS12236.1 | NM_003331.3 | CTGCCCTTGAGGGCTTTCAC     | CTCCCAACAGGTTGTCAGT     | TGTAACAGCAGGCCAGT | CAGGAACAGCTATGACC |
| TYK2_Exon-18;TYK2_Exon-19                | CCDS12236.1 | NM_003331.3 | GTTGGGAGGTGAGTCAAG       | CAGGAGAGATGATGAATACA    | TGTAACAGCAGGCCAGT | CAGGAACAGCTATGACC |
| TYK2_Exon-19;TYK2_Exon-20                | CCDS12236.1 | NM_003331.3 | CTTCACTGGGATCTAGCCAT     | GCTCTGCCAGCAGAT         | TGTAACAGCAGGCCAGT | CAGGAACAGCTATGACC |
| TYK2_Exon-20;TYK2_Exon-21                | CCDS12236.1 | NM_003331.3 | ACCCCGAAGGACGAGAT        | CGCCCACTGAACTCAC        | TGTAACAGCAGGCCAGT | CAGGAACAGCTATGACC |
| TYK2_Exon-22;TYK2_Exon-23                | CCDS12236.1 | NM_003331.3 | CCTCTCCAGCAGCAGTATG      | CAAACCTCTGACTCACGCTTA   | TGTAACAGCAGGCCAGT | CAGGAACAGCTATGACC |
| TYRO3_Exon-12;TYRO3_Exon-13              | CCDS10080.1 | NM_006293.2 | ACAAATCGCTGTGTGGAGTT     | AGGCTACAGCTATCCCACT     | TGTAACAGCAGGCCAGT | CAGGAACAGCTATGACC |
| TYRO3_Exon-13                            | CCDS10080.1 | NM_006293.2 | GGATGTTGTGGGGAATGTT      | AGGCTCTGTCTTCCAGATGCT   | TGTAACAGCAGGCCAGT | CAGGAACAGCTATGACC |
| TYRO3_Exon-14                            | CCDS10080.1 | NM_006293.2 | TTCAACACATAAACCAACA      | TCTTATGTGGAGACTTTG      | TGTAACAGCAGGCCAGT | CAGGAACAGCTATGACC |
| TYRO3_Exon-15;TYRO3_Exon-16              | CCDS10080.1 | NM_006293.2 | GGATGCCCAAGCAGTGT        | CTGGAGGGTGTGTTCTAGTG    | TGTAACAGCAGGCCAGT | CAGGAACAGCTATGACC |
| TYRO3_Exon-16;TYRO3_Exon-17              | CCDS10080.1 | NM_006293.2 | GTCTCCACAGCTCCTCTA       | CTGCTCACAGCTCCTCTG      | TGTAACAGCAGGCCAGT | CAGGAACAGCTATGACC |
| TYRO3_Exon-17;TYRO3_Exon-18              | CCDS10080.1 | NM_006293.2 | GGTAGCTTGGGAGCAAGATG     | CCATCAGCAAACTCCAGAT     | TGTAACAGCAGGCCAGT | CAGGAACAGCTATGACC |
| TYRO3_Exon-18                            | CCDS10080.1 | NM_006293.2 | CAGGACACTAGTGACAGTCT     | CAGTTCCTCTTCCAGGAT      | TGTAACAGCAGGCCAGT | CAGGAACAGCTATGACC |
| TYRO3_Exon-19                            | CCDS10080.1 | NM_006293.2 | AACCTCGGGCTCAATATACC     | GCACAGCTTGGGAGACTAC     | TGTAACAGCAGGCCAGT | CAGGAACAGCTATGACC |
| YES1_Exon-10                             | CCDS11824.1 | NM_005433.3 | TATCTCATGTCTCCACCTGTC    | AGTATTAGGTGCCAGCTGTACTT | TGTAACAGCAGGCCAGT | CAGGAACAGCTATGACC |
| YES1_Exon-11                             | CCDS11824.1 | NM_005433.3 | TTGTTGGACCCCTGAATATCG    | TAATCAATGGGTTGGCTTTT    | TGTAACAGCAGGCCAGT | CAGGAACAGCTATGACC |
| YES1_Exon-6                              | CCDS11824.1 | NM_005433.3 | TTTTAAAGATTTTAGACAACTTCA | CGATCTGCTCAGCTCTCTTA    | TGTAACAGCAGGCCAGT | CAGGAACAGCTATGACC |
| YES1_Exon-6;YES1_Exon-7                  | CCDS11824.1 | NM_005433.3 | ACAAAGTGTCAAGTTTCTCTATCC | AGAAGTCTGATGTTTATGCT    | TGTAACAGCAGGCCAGT | CAGGAACAGCTATGACC |
| YES1_Exon-8                              | CCDS11824.1 | NM_005433.3 | TCCCACTTCACTACACATAC     | CCGTAATCAGACTCTAGCCTTTT | TGTAACAGCAGGCCAGT | CAGGAACAGCTATGACC |
| YES1_Exon-9                              | CCDS11824.1 | NM_005433.3 | AGCTAAACAAATCTTATCTGGAAA | AAATTAATGGGATTAAGGTGG   | TGTAACAGCAGGCCAGT | CAGGAACAGCTATGACC |
| ZAP70_Exon-12                            | CCDS3254.1  | NM_001079.3 | CTCTCACCCAGGCTGT         | CTACTCTCACCCGGAAG       | TGTAACAGCAGGCCAGT | CAGGAACAGCTATGACC |
| ZAP70_Exon-7                             | CCDS3254.1  | NM_001079.3 | GTGCAGGAAACAGCATGG       | ATCCCAAAAGAAATCAAAATG   | TGTAACAGCAGGCCAGT | CAGGAACAGCTATGACC |
| ZAP70_Exon-8                             | CCDS3254.1  | NM_001079.3 | CGTGGTGGCAGCTACAGTT      | AATGGTGACTGAGGGTTAGC    | TGTAACAGCAGGCCAGT | CAGGAACAGCTATGACC |
| ZAP70_Exon-9;ZAP70_Exon-10               | CCDS3254.1  | NM_001079.3 | GTGTGGGTGATCCTCAAGC      | GTGACCCATAGCTCCAGAC     | TGTAACAGCAGGCCAGT | CAGGAACAGCTATGACC |
| ZAP70_Exon-9;ZAP70_Exon-10;ZAP70_Exon-11 | CCDS3254.1  | NM_001079.3 | CTACGCCAAGATCAGCAGTTT    | ACTGGAGGACAGCAAC        | TGTAACAGCAGGCCAGT | CAGGAACAGCTATGACC |









|         |            |             |                                         |                                         |                   |
|---------|------------|-------------|-----------------------------------------|-----------------------------------------|-------------------|
| PTK7-20 | CCDS4884.1 | NM_02821.3  | GTA AACGACGGCCAGTTC AAGTCC ACAAAGTTTG   | AGACCTCAGCAATGCCTGTTG                   | GTA AACGACGGCCAGT |
| ROR2-1  | CCDS6691.1 | NM_004560.2 | GTA AACGACGGCCAGTGGACGCATCGTAGAAAGGG    | GCTTATTGTA ACCAGCCCGAG                  | GTA AACGACGGCCAGT |
| ROR2-2  | CCDS6691.1 | NM_004560.2 | GTA AACGACGGCCAGTCCC GATTTGCTATTCTTGTG  | AAACACAGGAATCAAGGTGGC                   | GTA AACGACGGCCAGT |
| ROR2-3  | CCDS6691.1 | NM_004560.2 | GTA AACGACGGCCAGTTCCTTGG AAGAGTTCTAAGC  | TGCTGACTGGTGTGTTCAG                     | GTA AACGACGGCCAGT |
| ROR2-4  | CCDS6691.1 | NM_004560.2 | GTA AACGACGGCCAGTCTTCCCTGTGTGGTGTTC     | CAAAATCGGCAAGACATGAG                    | GTA AACGACGGCCAGT |
| ROR2-5  | CCDS6691.1 | NM_004560.2 | AATTGCTGGATCGCAAGATG                    | GTA AACGACGGCCAGTCCC ACTGACCATGCCATTAAC | GTA AACGACGGCCAGT |
| ROR2-6  | CCDS6691.1 | NM_004560.2 | GTA AACGACGGCCAGTGTGGGCACTGGGATGC       | CCTGGGCTTCA CCGACAC                     | GTA AACGACGGCCAGT |
| ROR2-7  | CCDS6691.1 | NM_004560.2 | GTA AACGACGGCCAGTATTTGGGCTTGGGACTTC     | GTCAGGACAGAAAGCCCTC                     | GTA AACGACGGCCAGT |
| ROR2-8  | CCDS6691.1 | NM_004560.2 | GTA AACGACGGCCAGTAGGTGGAGAGTGGTGTGTAG   | GCAGTGAATCCCAACAGC                      | GTA AACGACGGCCAGT |
| ROR2-9  | CCDS6691.1 | NM_004560.2 | GTA AACGACGGCCAGTAGGAAGTCAAGTGTGTCCAGC  | AGCTGAAGATCATGCTCAGGG                   | GTA AACGACGGCCAGT |
| ROR2-9  | CCDS6691.1 | NM_004560.2 | GACCGGTTGGAAAGTCTAC                     | GTA AACGACGGCCAGTCA CACCCTAGGACAGATGTC  | GTA AACGACGGCCAGT |
| ROR2-9  | CCDS6691.1 | NM_004560.2 | AGTACCTATCCAGCCACACG                    | GTA AACGACGGCCAGTGTGCTCACATTTGCTCACTGG  | GTA AACGACGGCCAGT |
| ROR2-9  | CCDS6691.1 | NM_004560.2 | GTA AACGACGGCCAGTCAAGTTCCTCATCGACTCAG   | ATCTGCATTTGGGATCTGCAC                   | GTA AACGACGGCCAGT |
| ROR2-9  | CCDS6691.1 | NM_004560.2 | CCAGTGAGCAATGTGAGCAAC                   | GTA AACGACGGCCAGTCTCAAAGGTGACTGAGGTCCC  | GTA AACGACGGCCAGT |
| TIE1-1  | CCDS482.1  | NM_005424.2 | GTA AACGACGGCCAGTAGCCACCTATTCTCTTCC     | AATTGATCCTCCCATCTCAGC                   | GTA AACGACGGCCAGT |
| TIE1-2  | CCDS482.1  | NM_005424.2 | GTA AACGACGGCCAGTAGTAAGACCAGAGGGCTGGG   | GACCTTGTCTGGAAGCAGGTG                   | GTA AACGACGGCCAGT |
| TIE1-3  | CCDS482.1  | NM_005424.2 | ACAGCCCTGGAGGTGAGTTAG                   | GTA AACGACGGCCAGTCTACAGGAGAGGCCCTGG     | GTA AACGACGGCCAGT |
| TIE1-4  | CCDS482.1  | NM_005424.2 | AGCTGAGCAGAGGTGGACAG                    | GTA AACGACGGCCAGTCTGGAGGAAGGTGTCTTACG   | GTA AACGACGGCCAGT |
| TIE1-5  | CCDS482.1  | NM_005424.2 | GTA AACGACGGCCAGTGCCCTATGGGTACTCTCTGTG  | CACCCACATGGTCTAGGGTC                    | GTA AACGACGGCCAGT |
| TIE1-6  | CCDS482.1  | NM_005424.2 | GACCTTAGAACCTGTGGGTG                    | GTA AACGACGGCCAGTAA GTCAGAGGCAGAGTGGAGG | GTA AACGACGGCCAGT |
| TIE1-7  | CCDS482.1  | NM_005424.2 | GTA AACGACGGCCAGTCCAGTCTTCTATCCTCAGCC   | AGAGCTCCCTGTCCATCAGAC                   | GTA AACGACGGCCAGT |
| TIE1-8  | CCDS482.1  | NM_005424.2 | GTA AACGACGGCCAGTCTCCACTGAGAAACAGAAACAG | CTGACCTCATGTGAGCAATGG                   | GTA AACGACGGCCAGT |
| TIE1-9  | CCDS482.1  | NM_005424.2 | GTA AACGACGGCCAGTATCAGTCCAGAGGCACACCTG  | AGTATCTCCAGCTGAGCAGC                    | GTA AACGACGGCCAGT |
| TIE1-10 | CCDS482.1  | NM_005424.2 | CCAGCTTGA AACAAAGATGC                   | GTA AACGACGGCCAGTCTAGAGCTGGCATGTCTCC    | GTA AACGACGGCCAGT |
| TIE1-11 | CCDS482.1  | NM_005424.2 | GTA AACGACGGCCAGTGTAGTAGSAGAGAGCTGGG    | CAAGSAAACAACTCCAGTG                     | GTA AACGACGGCCAGT |
| TIE1-12 | CCDS482.1  | NM_005424.2 | GTA AACGACGGCCAGTTGTTCTCTTGTTCACCTGGG   | CCTCCGCTGTCTCTAGTGC                     | GTA AACGACGGCCAGT |
| TIE1-13 | CCDS482.1  | NM_005424.2 | GTA AACGACGGCCAGTCTAGAGCAGATGTGTCCAGCC  | TGTGGAGGAGAGCCTGC                       | GTA AACGACGGCCAGT |
| TIE1-14 | CCDS482.1  | NM_005424.2 | GTA AACGACGGCCAGTGGGATCTTCCACTCTCCCTC   | CACACAAGGTTGACAAGTATTG                  | GTA AACGACGGCCAGT |
| TIE1-15 | CCDS482.1  | NM_005424.2 | GTA AACGACGGCCAGTTGACACTGAAACCTCCTCTGTG | GTCAAATGCTGGAGGAAGCC                    | GTA AACGACGGCCAGT |
| TIE1-16 | CCDS482.1  | NM_005424.2 | GTA AACGACGGCCAGTCTTGTCCCAAAATCCCAAG    | GATGAAGGAGATCAAGGGTG                    | GTA AACGACGGCCAGT |
| TIE1-17 | CCDS482.1  | NM_005424.2 | GTA AACGACGGCCAGTATCCCTGTCTGTACCATCGG   | GGCTGACTTCTCCACTGACAC                   | GTA AACGACGGCCAGT |
| TIE1-18 | CCDS482.1  | NM_005424.2 | CGAAGACTGACTCTTACTGGC                   | GTA AACGACGGCCAGTCCCTAGGAGAAATGGGTTTG   | GTA AACGACGGCCAGT |
| TIE1-19 | CCDS482.1  | NM_005424.2 | AGTCTCATTCAACCTCACCC                    | GTA AACGACGGCCAGTCCACTGTGTCCACCTGGAAC   | GTA AACGACGGCCAGT |
| TIE1-20 | CCDS482.1  | NM_005424.2 | GTA AACGACGGCCAGTTGGCCAAAGCCAGATACTTAC  | ACACTTCACTGTCACAGTTTCG                  | GTA AACGACGGCCAGT |
| TIE1-21 | CCDS482.1  | NM_005424.2 | GTA AACGACGGCCAGTGGGAGATAGTAGGCTTGGTG   | CTAGCTGTAGCCCAATCTGGG                   | GTA AACGACGGCCAGT |
| TIE1-22 | CCDS482.1  | NM_005424.2 | GTA AACGACGGCCAGTTCAGCTTGTATCCTGTGACC   | GCCTGGTGTCAAACCAAGTGAAC                 | GTA AACGACGGCCAGT |
| TIE1-23 | CCDS482.1  | NM_005424.2 | GTA AACGACGGCCAGTATGGAAGTCCAGGAGCTTGAAG | CACCTACAAGCATGGGAACC                    | GTA AACGACGGCCAGT |

#The primer pair did not meet our quality criteria that 250% of bases in the target region have a Phred quality score of at least 20 in three quarters of the tumor samples analyzed.

**Table S4. Characteristics of melanoma patients with PTK mutations**

| Sample | Patient Age (years)* | Patient Gender | Tumor Source                         | Matched normal source |
|--------|----------------------|----------------|--------------------------------------|-----------------------|
| 1T     | 29                   | F              | Lung                                 | Blood                 |
| 2T     | 30                   | M              | Pectoral muscle                      | Blood                 |
| 3T     | 18                   | M              | Forehead, subcutaneous               | Blood                 |
| 4T     | 33                   | F              | Supraclavicular, soft tissue         | Blood                 |
| 4T     | 34                   | F              | Lung                                 | Blood                 |
| 5T     | 47                   | M              | External iliac soft tissue           | Blood                 |
| 6T     | 42                   | M              | Neck, soft tissue                    | Blood                 |
| 7T     | 53                   | M              | Stomach                              | Blood                 |
| 8T     | 61                   | M              | Inguinal soft tissue                 | Blood                 |
| 9T     | 62                   | M              | Back, subcutaneous                   | Blood                 |
| 10T    | 55                   | M              | Axillary soft tissue                 | Blood                 |
| 12T    | 53                   | M              | Upper arm, subcutaneous              | Blood                 |
| 13T    | 49                   | M              | Chest wall, subcutaneous             | Blood                 |
| 15T    | 39                   | M              | Thigh, subcutaneous                  | Blood                 |
| 16T    | 62                   | M              | Lung                                 | Blood                 |
| 17T    | 33                   | M              | Shoulder, subcutaneous               | Blood                 |
| 18T    | 55                   | M              | Clavicle, soft tissue                | Blood                 |
| 19T    | 49                   | M              | Scapula, subcutaneous                | Blood                 |
| 20T    | 58                   | F              | Axillary soft tissue                 | Blood                 |
| 21T    | 59                   | M              | Omentum                              | Blood                 |
| 22T    | 51                   | M              | Chest wall, subcutaneous             | Blood                 |
| 23T    | 44                   | M              | Lung                                 | Blood                 |
| 24T    | 49                   | M              | Axillary soft tissue                 | Blood                 |
| 26T    | 48                   | F              | Lung                                 | Blood                 |
| 28T    | 28                   | F              | Axillary soft tissue                 | Blood                 |
| 29T    | 51                   | M              | Inguinal soft tissue                 | Blood                 |
| 30T    | 53                   | F              | Lung                                 | Blood                 |
| 31T    | 49                   | F              | Thigh, subcutaneous                  | Blood                 |
| 32T    | 58                   | M              | Omentum                              | Blood                 |
| 33T    | 33                   | M              | Chest wall subcutaneous, & pleura ** | Blood                 |
| 34T    | 31                   | M              | Shoulder, subcutaneous               | Blood                 |
| 35T    | 23                   | F              | Thigh, subcutaneous                  | Blood                 |
| 36T    | 25                   | M              | Thigh, subcutaneous                  | Blood                 |
| 37T    | 38                   | F              | Omentum                              | Blood                 |
| 38T    | 27                   | M              | Skull                                | Blood                 |
| 39T    | 56                   | M              | Mesentery                            | Blood                 |
| 41T    | 45                   | M              | Neck, soft tissue                    | Blood                 |
| 43T    | 19                   | F              | Popliteal soft tissue                | Blood                 |
| 44T    | 56                   | M              | Lung                                 | Blood                 |
| 45T    | 48                   | M              | Mediastinum                          | Blood                 |
| 49T    | 43                   | M              | Thigh, subcutaneous                  | Blood                 |
| 50T    | 49                   | F              | Inguinal soft tissue                 | Blood                 |
| 51T    | 50                   | F              | Adnexa                               | Blood                 |
| 52T    | 39                   | F              | Lung                                 | Blood                 |
| 54T    | 27                   | M              | Subcutaneous                         | Blood                 |
| 55T    | 60                   | M              | Lung                                 | Blood                 |
| 56T    | 52                   | M              | Lung                                 | Blood                 |
| 58T    | 46                   | F              | Hip, subcutaneous                    | Blood                 |
| 59T    | 64                   | F              | Abdomen, subcutaneous                | Blood                 |
| 60T    | 46                   | M              | Flank, subcutaneous                  | Blood                 |
| 62T    | 58                   | F              | Thigh, subcutaneous                  | Blood                 |
| 63T    | 30                   | M              | Jejunum                              | Blood                 |
| 64T    | 32                   | F              | Ovary                                | Blood                 |
| 68T    | 49                   | M              | Lung                                 | Blood                 |
| 69T    | 36                   | M              | Axillary soft tissue                 | Blood                 |
| 71T    | 67                   | M              | Lung                                 | Blood                 |
| 72T    | 53                   | M              | Liver                                | Blood                 |
| 73T    | 45                   | F              | Breast                               | Blood                 |
| 74T    | 40                   | F              | Lower extremity, subcutaneous        | Blood                 |
| 76T    | 40                   | M              | Neck, soft tissue                    | Blood                 |
| 77T    | 39                   | M              | Lung                                 | Blood                 |
| 78T    | 27                   | F              | Lung                                 | Blood                 |
| 79T    | 53                   | M              | Supraclavicular, soft tissue         | Blood                 |
| 80T    | 36                   | F              | Popliteal soft tissue                | Blood                 |
| 81T    | 60                   | F              | Upper arm, subcutaneous              | Blood                 |
| 83T    | 33                   | F              | Back, subcutaneous                   | Blood                 |
| 84T    | 60                   | F              | Thigh, subcutaneous                  | Blood                 |
| 85T    | 44                   | M              | Chest wall, subcutaneous             | Blood                 |
| 86T    | 42                   | F              | Liver                                | Blood                 |
| 87T    | 27                   | M              | Small bowel & mesentery **           | Blood                 |
| 88T    | 37                   | F              | Chest wall, subcutaneous             | Blood                 |
| 90T    | 19                   | M              | Neck, soft tissue                    | Blood                 |
| 91T    | 55                   | F              | Subcostal soft tissue                | Blood                 |
| 92T    | 37                   | F              | Femur                                | Blood                 |
| 93T    | 42                   | F              | Axillary soft tissue                 | Blood                 |
| 94T    | 44                   | M              | Adrenal gland                        | Blood                 |
| 95T    | 58                   | F              | Inguinal soft tissue                 | Blood                 |
| 96T    | 49                   | M              | Inguinal soft tissue                 | Blood                 |
| 99T    | 57                   | M              | Liver                                | Blood                 |

\* Patient's age when tumor was surgically removed. \*\* Cell line generated by cells mixed from 2 tumors resected during the patient's surgery. Abbreviations: F, female; M, male.

**Table S5. Mutations Identified in RAF and RAS isoforms in melanoma samples containing ERBB4 mutations**

| Sample | ERBB4             | BRAF             | NRAS   | ARAF         | CRAF    | HRAS | KRAS |
|--------|-------------------|------------------|--------|--------------|---------|------|------|
| 7T     | E452K             | wt               | Q61R   | wt           | wt      | wt   | wt   |
| 12T    | E563K             | wt               | Q61Q/R | wt           | wt      | wt   | wt   |
| 17T    | E317K             | wt               | Q61Q/K | wt           | wt      | wt   | wt   |
| 31T    | wt                | wt               | wt     | wt           | wt      | wt   | wt   |
| 34T    | R491K             | V600V/E          | wt     | wt           | T362T/A | wt   | wt   |
| 39T    | wt                | wt               | wt     | wt           | wt      | wt   | wt   |
| 49T    | R393R/W           | V600V/E          | wt     | wt           | wt      | wt   | wt   |
| 55T    | E452K             | V600V/E          | wt     | P216S, P254L | wt      | wt   | wt   |
| 56T    | R544R/W           | V600V/E          | wt     | wt           | wt      | wt   | wt   |
| 63T    | E542K, E872K      | wt               | Q61Q/K | wt           | wt      | wt   | wt   |
| 68T    | Splice Site / LOH | V600V/E          | wt     | wt           | wt      | wt   | wt   |
| 71T    | L39L/F, S1246S/N  | V600V/M, V600V/E | wt     | wt           | wt      | wt   | wt   |
| 86T    | E836E/K           | V600V/E          | wt     | wt           | wt      | wt   | wt   |
| 93T    | wt                | wt               | wt     | A345A/G      | wt      | wt   | wt   |

**Table S6. Primers used for PCR amplification and sequencing of RAS and Raf isoforms**

| Gene and Exon Name   | Forward Primer                              | Reverse Primer                               | Sequencing Primer  |
|----------------------|---------------------------------------------|----------------------------------------------|--------------------|
| ARAF-1               | TGAGCAGGATCTTGGACTG                         | GTA AACGACGCGCCAGTCAGCTGATGTCCCATCCTTC       | GTA AACGACGCGCCAGT |
| ARAF-2               | GTCTATGGAAAGCGAATGCG                        | GTA AACGACGCGCCAGTCAGAAGGAATCAATGACTGAGG     | GTA AACGACGCGCCAGT |
| ARAF-3               | GTA AACGACGCGCCAGTTCATCCCTCTGAGCCTGTTCC     | AGCAGGGAAGTTTGAGACTG                         | GTA AACGACGCGCCAGT |
| ARAF-4               | GTA AACGACGCGCCAGTACCCAACTCCCACTCATT        | CACGGGTCAGCTGTCTGAAG                         | GTA AACGACGCGCCAGT |
| ARAF-5               | AGTACCAACCGCCCAACAGTG                       | GTA AACGACGCGCCAGTGAGAAATGAGGTGACTTGCCC      | GTA AACGACGCGCCAGT |
| ARAF-6               | CAATATGATGTTTATGGCTGG                       | GTA AACGACGCGCCAGTCATCAGTGTGAACTCTGGCC       | GTA AACGACGCGCCAGT |
| ARAF-7               | GTA AACGACGCGCCAGTCAACGTCCTCATATGTCAGCAC    | CTGGTGACTTGGAAATGTGGG                        | GTA AACGACGCGCCAGT |
| ARAF-8               | CCAGAGTTTCAGCACTGATGG                       | GTA AACGACGCGCCAGTCCAGATGGTGGCATCTAAG        | GTA AACGACGCGCCAGT |
| ARAF-9               | GTA AACGACGCGCCAGTGAAGAGTGGTATGCTCGAGGG     | ATGTCCAGGAAGCACTCCAG                         | GTA AACGACGCGCCAGT |
| ARAF-10              | GTA AACGACGCGCCAGTGAACAGTGCCTCACTGATG       | TCTCGGTGATGATGTTCTTG                         | GTA AACGACGCGCCAGT |
| ARAF-11              | GGATTTGCCATCATCACAG                         | GTA AACGACGCGCCAGTCCCTGTAATTCAGAAACCC        | GTA AACGACGCGCCAGT |
| ARAF-12              | GTA AACGACGCGCCAGTCAAGGTTGTGGATGTTTGGC      | GTGGACATGAGGAGTCCAG                          | GTA AACGACGCGCCAGT |
| ARAF-13              | GTGTGGGTGCTGTGAGTTG                         | GTA AACGACGCGCCAGTGGCATTTATCAGTGCAAAAGG      | GTA AACGACGCGCCAGT |
| ARAF-14              | GTA AACGACGCGCCAGTGCAGAGAATCCCTCCCAAGTC     | TCACATCTGCCTCATCTCAG                         | GTA AACGACGCGCCAGT |
| ARAF-15 <sup>a</sup> | GTGTGTGTTCCACATGAGGC                        | GTA AACGACGCGCCAGTGGCAGAGCAACATTGATTG        | GTA AACGACGCGCCAGT |
| BRAF-1               | GTA AACGACGCGCCAGTAGCTCTCCGCTCCCTTC         | AAGGTGGCTGAGGGCATC                           | GTA AACGACGCGCCAGT |
| BRAF-2               | GTA AACGACGCGCCAGTGCAGCACTGGCAGTACTGTG      | TCTCTTCCCAATCTATTCTAATCC                     | GTA AACGACGCGCCAGT |
| BRAF-3               | TGSGTGTGATCTGACCTAGTAACCC                   | GTA AACGACGCGCCAGTCCATATGGCCCTACAGTATTTCTTC  | GTA AACGACGCGCCAGT |
| BRAF-4               | GTA AACGACGCGCCAGTCCCTCCCTCACTGTTACTAGCCC   | TTACTTCCATATTTACATTTCC                       | GTA AACGACGCGCCAGT |
| BRAF-5               | GTA AACGACGCGCCAGTGTAGTCCATCTATTACTTTGAACCC | GGGAGAAACTGCTCCATTTCC                        | GTA AACGACGCGCCAGT |
| BRAF-6               | GTGTTTCTGAGAATGAAATTTGA                     | GTA AACGACGCGCCAGTCTGAGTGGTATGATAAGTTATTTGGG | GTA AACGACGCGCCAGT |
| BRAF-7               | GTA AACGACGCGCCAGTGCCTTTGGCAGTATTGGATT      | TCATCAGAGAAACAGCAAGC                         | GTA AACGACGCGCCAGT |
| BRAF-8               | GTA AACGACGCGCCAGTGGTTTACATTGGCAAGTCTTC     | GTACTTGAAGAGGCAAGTATAAAGG                    | GTA AACGACGCGCCAGT |
| BRAF-9               | GTA AACGACGCGCCAGTTTGGCCCATCTCTTCCA         | GCAGTGCCTGAGAAATGTGTT                        | GTA AACGACGCGCCAGT |
| BRAF-10              | CTTCTCTATCCCTCTCAGGC                        | GTA AACGACGCGCCAGTGGCAAGTGAATATTTCCCTTGATG   | GTA AACGACGCGCCAGT |
| BRAF-11              | GTA AACGACGCGCCAGTCCATCGAACAAACAAAGTTGG     | AATAGTTGCTACCCTGGGAAC                        | GTA AACGACGCGCCAGT |
| BRAF-12              | CAATTGGCCAGTCTCTTAAATGATC                   | GTA AACGACGCGCCAGTTTACATCCTTATGTTCTGAC       | GTA AACGACGCGCCAGT |
| BRAF-13              | GTA AACGACGCGCCAGTCACTGGATAAATAGGCTTGAATGG  | CTCATACATGCAACAATCC                          | GTA AACGACGCGCCAGT |
| BRAF-14              | TCATCCTAACACATTTCAAGCC                      | GTA AACGACGCGCCAGTGTGTAATCTGGGAATCTGAAA      | GTA AACGACGCGCCAGT |
| BRAF-15              | GAATCTCTGGCAATGATGGT                        | GTA AACGACGCGCCAGTTCACGCTTACCCAGGATTA        | GTA AACGACGCGCCAGT |
| BRAF-16              | CCATCTATGATGGCATTGG                         | GTA AACGACGCGCCAGTCAACCTCATGGAAGCCATC        | GTA AACGACGCGCCAGT |
| BRAF-17              | GCTTTCTTGAAGTGTGATGGG                       | GTA AACGACGCGCCAGTCCACAGCAAGTGTCTTGAGTTC     | GTA AACGACGCGCCAGT |
| RAF-1-1              | GTA AACGACGCGCCAGTCTGGTCCCATTTTCCCTCATC     | ATAGGGGTTGGGAAGGAAC                          | GTA AACGACGCGCCAGT |
| RAF-1-2              | GTA AACGACGCGCCAGTATTTCTGTGCCACCTTTCC       | AGGTATTGGTCTCAGGGCC                          | GTA AACGACGCGCCAGT |
| RAF-1-3              | GTA AACGACGCGCCAGTGGCCTTGAGCAAAATACCTTC     | TTGCTTACTGTAAACAGCAGCA                       | GTA AACGACGCGCCAGT |
| RAF-1-4              | GTA AACGACGCGCCAGTGGAGGCCAAAGTAAGTTG        | ATGAAATGCCCAACCTAGC                          | GTA AACGACGCGCCAGT |
| RAF-1-5              | GTA AACGACGCGCCAGTAAAGCAAGCAGCATGATGG       | CCAGAAAGCAGCAAGGG                            | GTA AACGACGCGCCAGT |
| RAF-1-6              | GTA AACGACGCGCCAGTGGTGTACAGTGTAGATTTGGCC    | TCCTTGATCAGATTTGAAACCC                       | GTA AACGACGCGCCAGT |
| RAF-1-7              | GTA AACGACGCGCCAGTTGAAAAATCAGCCTTGAGA       | TTGGCAGGAGTACTGTGTC                          | GTA AACGACGCGCCAGT |
| RAF-1-8              | GGATCGAATTCGAAGTCACAG                       | GTA AACGACGCGCCAGTCTGTGATGCAAGTGTGCC         | GTA AACGACGCGCCAGT |
| RAF-1-9              | AACAGATGACATGGGTTGATCC                      | GTA AACGACGCGCCAGTCTCAGTCCCTCTCCCTCTGC       | GTA AACGACGCGCCAGT |
| RAF-1-10             | GTA AACGACGCGCCAGTTGAAATTTGCCGTATCTGTG      | CGGGCACAGTCCCACTAATC                         | GTA AACGACGCGCCAGT |
| RAF-1-11             | GTA AACGACGCGCCAGTGCAGCAGCAGAAACCACTGTC     | GGCTTGTGCAAAATATCACAG                        | GTA AACGACGCGCCAGT |
| RAF-1-12             | GTA AACGACGCGCCAGTCCCTGTGTGTAACACTCCTTGG    | TTCTGCTCTCTGCCTTTTC                          | GTA AACGACGCGCCAGT |
| RAF-1-13             | GCTGTGACGAGTAAAGTGG                         | GTA AACGACGCGCCAGTATGCAATTCGCCCTGAGGC        | GTA AACGACGCGCCAGT |
| RAF-1-14             | GTA AACGACGCGCCAGTCAATGAAAGGGACAGCCTGG      | AGCCTTCTATTGTTTTGGG                          | GTA AACGACGCGCCAGT |
| RAF-1-15             | CAGGTAAAGTGTGTGGTGG                         | GTA AACGACGCGCCAGTCCATCTGTAGAGGACCTGGG       | GTA AACGACGCGCCAGT |
| RAF-1-16             | CCAGGTCCTCTACAAGATGG                        | GTA AACGACGCGCCAGTAAACATGTGTTGTGCTCTGG       | GTA AACGACGCGCCAGT |
| HRAS-1               | TGGGTCTAATAGCAAGTGG                         | GTA AACGACGCGCCAGTTAGAGGAAGCAGGAGACAGG       | GTA AACGACGCGCCAGT |
| HRAS-2               | GTA AACGACGCGCCAGTGTGAGGCTGGCTGTGAAC        | GACATCGCCAGAGGAGACAG                         | GTA AACGACGCGCCAGT |
| HRAS-3               | TTCTGTGTGTGTTGCCATC                         | GTA AACGACGCGCCAGTGTGAGTGTGCTCCCTGG          | GTA AACGACGCGCCAGT |
| HRAS-4               | GCCTCTGTGCTCTCTGC                           | GTA AACGACGCGCCAGTGTGCTCTCCCAAGGACCTC        | GTA AACGACGCGCCAGT |
| KRAS-1               | GTA AACGACGCGCCAGTAAAGCCCACTGTGAAGCTGGT     | AGAGAAGCAGGCTAAGTTG                          | GTA AACGACGCGCCAGT |
| KRAS-2               | GTA AACGACGCGCCAGTGTCCGAGATGAGATATGG        | TTTCAATGCTCTTCCCTC                           | GTA AACGACGCGCCAGT |
| KRAS-3               | GTA AACGACGCGCCAGTAAAGCTTGGCATGTCCTGAC      | ACTCGATCAGACAGCAGGC                          | GTA AACGACGCGCCAGT |
| KRAS-4               | ATTTCCACATTCGAGGCTGAG                       | GTA AACGACGCGCCAGTGCAATGTCAACATGGGAAGG       | GTA AACGACGCGCCAGT |
| NRAS-1               | GTA AACGACGCGCCAGTCCAAATGGAAGGTCAACTAGG     | GAACTCACTAGTATTGCAATG                        | GTA AACGACGCGCCAGT |
| NRAS-2               | GTA AACGACGCGCCAGTAATAGCATTCATCCCTGTG       | CTCTGGTTCCAGTCACTCC                          | GTA AACGACGCGCCAGT |
| NRAS-3               | GTA AACGACGCGCCAGTAAAGCACTGTCGCCCTCTCAG     | CAAGAGACAGGCTGCAAGT                          | GTA AACGACGCGCCAGT |
| NRAS-4               | GCTCTGTGTGATCAATAGG                         | GTA AACGACGCGCCAGTTGTGAGAAAGGATAGGCAG        | GTA AACGACGCGCCAGT |

<sup>a</sup>The primer pair did not meet our quality criteria that ≥90% of bases in the target region have a Phred quality score of at least 20 in three quarters of the tumor samples analyzed.

**Table S7. Primers used for ERBB4 plasmid construction**

| Gene Name                                                  | Forward Primer                 | Reverse Primer                 |
|------------------------------------------------------------|--------------------------------|--------------------------------|
| ERBB4 into pCDF-MCS2-EF1-Puro™                             | CGGCTCTAGAGCCACATGAAAGCCGGCGAC | ATCGGGCGGCGCTTACACCACAGTATTCGG |
| Knockdown resistant ERBB4 primers into pCDF1-MCS2-EF1-puro | CACCAAAATCAAGGGGACTT           | GGAGCCAGTACACGACATCA           |
| Knockdown resistant ERBB4 primer set #1 into pcDNA3.1      | GATTCTGTGGCCATTAAAGTTCT        | AGAATCTTAATGGCCACAGGAATC       |
| Knockdown resistant ERBB4 primer set #2 into pcDNA3.1      | CCTGTGGCCATCAAGATTCT           | AGAATCTTGTATGGCCACAGG          |
| Knockdown resistant ERBB4 primer set #3 into pcDNA3.1      | CCTGTGGCCATCAAAATCTTAATGAGAC   | GTCTCTAAGAATTTTGTATGGCCACAGG   |

**Supplementary Note**  
**Tumor Tissue Collection**

A panel of 79 pathology-confirmed metastatic melanoma tumor resections was assembled from patients referred to the Surgery Branch of the National Cancer Institute for enrollment in IRB-approved Surgery Branch clinical trials of immunotherapy. All of the patients had progressive metastatic melanoma that had failed available conventional treatments, were 16 years or older and passed eligibility testing for the relevant protocol. None had received therapy for 1 month prior to entering the protocol. Before tissue was acquired all patients signed written informed consents. The melanoma tissue panel was selected on the basis of an available pathology-confirmed, melanoma tissue culture line, paired with freshly frozen tissue from the resected melanoma metastasis and apheresis-collected, peripheral blood mononuclear cells.
